# Supplementary material
Source: PubMed Central journal article supplement (PMC4279061)
Supplement: peds.2013-3885_peds.2013-3885SupplementaryData.pdf [file peds.2013-3885_peds.2013-3885SupplementaryData.pdf]

## Supplemental Information

**SUPPLEMENTAL TABLE 6** Family-Initiated Medication Dialogue Coding Scheme Summary

| Topic                           | Description                                                                                            |
|---------------------------------|--------------------------------------------------------------------------------------------------------|
| Scheduling                      | Dialogue about the frequency, timing, or duration of a medication                                      |
| ADR                             | Dialogue about an ADR patients either believe they are experiencing or has the potential to experience |
| Clarification                   | Dialogue requesting or providing additional information about a medication                             |
| Indication                      | Dialogue about the rationale for the medication's use                                                  |
| Dose or rate                    | Dialogue about the medication dose or rate                                                             |
| Route                           | Dialogue about the route of the medication                                                             |
| Suggestion                      | Dialogue that requests suggestions for medication to address a perceived need or symptom               |
| Formulation                     | Dialogue about the medication's formulation or flavor, including brand/generic substitutions           |
| Contraindication or interaction | Dialogue about the medication's contraindications or interactions with other drugs                     |
| Monitoring                      | Dialogue about the monitoring of medication effectiveness or toxicity                                  |
| Duplication                     | Dialogue about either 2 identical medications or 2 medications to treat the same condition             |
| Missing medication              | Dialogue about a medication that the patient should be receiving or is expecting to receive but is not |
| Other                           | Dialogue about any other medication-related topic                                                      |
| Health care team response       |                                                                                                        |
| Inform                          | Response that provides information to address the family's medication-related dialogue                 |
| Acknowledgment                  | Response that acknowledges the family's medication-related dialogue                                    |
| Change                          |                                                                                                        |
| Add medication                  | Health care team ordered a medication                                                                  |
| Stop medication                 | Health care team discontinued a medication                                                             |
| Scheduling change               | Health care team changed the medication's frequency or duration                                        |
| Dose or rate change             | Health care team changed medication's dose or rate                                                     |
| Route change                    | Health care team changed the medication's route                                                        |
| Formulation change              | Health care team changed the medication's formulation or flavor                                        |
| Defer                           | Response indicating that additional information is needed before a full response can be made           |
| No response                     | No response or acknowledgment is made                                                                  |

**SUPPLEMENTAL TABLE 7** Therapeutic Class of Medications Discussed in Family-Initiated Medication Dialogue (*N* = 318 Instances)

| Class                     | %    | <i>N</i> |
|---------------------------|------|----------|
| Anti-infective agents     | 31.1 | 99       |
| Analgesics                | 13.8 | 44       |
| Corticosteroids           | 11.3 | 36       |
| $\beta$ -agonists         | 6.3  | 20       |
| Antiemetic agents         | 4.4  | 14       |
| Gastrointestinal agents   | 2.8  | 9        |
| Nutrients or electrolytes | 2.5  | 8        |
| Sedative-hypnotic agents  | 1.3  | 4        |
| Antipruritic agents       | 0.1  | 2        |
| Dermatologic agents       | 0.1  | 2        |
| Other <sup>a</sup>        | 25.2 | 80       |

Values may not add to 100% due to rounding.

<sup>a</sup> Includes medications that were mentioned only once such as pancrelipase, desmopressin, granulocyte colony-stimulating factor, or insulin.
